# Supplementary material
Source: Elsevier journal article supplement (https://www.sciencedirect.com/science/article/pii/S0213911118300712)

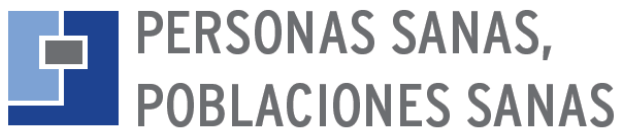

PR.01

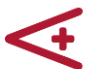

OBSERVATORIO DE SALUD  
EN ASTURIAS

## PROCEDIMIENTO

*Recogida de información cuestionario de evaluación del impacto  
en los determinantes sociales de las desigualdades en salud.*

Edición: 2

Nº Páginas: 6

Fecha: 01/11/2017

DGSP

|         |                                       |           |
|---------|---------------------------------------|-----------|
| 1       | Primera edición de este procedimiento | 9/12/14   |
| 2       | Segunda edición de este procedimiento | 01/11/17  |
| Edición | Concepto                              | Fecha     |
|         |                                       | APROBADO: |

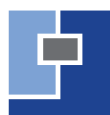

## ÍNDICE

|                                                       |          |
|-------------------------------------------------------|----------|
| <b>1. OBJETO</b>                                      | <b>3</b> |
| <b>2. ALCANCE</b>                                     | <b>3</b> |
| <b>3. REFERENCIAS</b>                                 | <b>3</b> |
| <b>4. ASPECTOS METODOLÓGICOS</b>                      | <b>4</b> |
| <b>5. RESPONSABILIDADES Y SISTEMÁTICA OPERACIONAL</b> | <b>5</b> |
| <b>6. ALGORITMO</b>                                   | <b>6</b> |

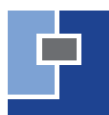

## 1. OBJETO

En este procedimiento se establecen los criterios y métodos para llevar a cabo la *evaluación del impacto en los determinantes sociales de las desigualdades en salud* a través de una herramienta validada por el Departamento Vasco de Salud.

## 2. ALCANCE

Este documento afecta a todas las evaluaciones realizadas con el cuestionario: *Evaluación del impacto en los determinantes sociales de las desigualdades en salud*

## 3. REFERENCIAS

[\*Herramienta de cribado para la Evaluación del Impacto en Salud de las políticas públicas sectoriales.\*](#)

Vitoria-Gasteiz: Departamento de Salud del Gobierno Vasco, 2014.

[\*Personas Sanas, poblaciones sanas: ordenación y elaboración de las Estrategias de Salud y Atención a las Personas con Enfermedades Crónicas.\*](#) Consejería de Sanidad. Gobierno del Principado de Asturias, 2014.

[\*Avanzando en Equidad\*](#), Ministerio de Sanidad y Servicios Sociales, 2010



## 4. ASPECTOS METODOLÓGICOS

### Equipo de trabajo

El equipo inicial de trabajo estará compuesto al menos por dos miembros del Servicio de Evaluación de la Salud, Calidad y Programas, así como otros colaboradores externos que puedan participar en el desarrollo del proyecto.

### Equipo evaluador

El equipo evaluador que participará directamente en el desarrollo de las entrevistas estará compuesto por dos personas; una de ellas será la responsable de coordinar la realización de la entrevista y su acompañante actuará de apoyo recogiendo aquella información que se considere más relevante para el objeto de estudio y aclarando las dudas que sean necesarias.

### Técnica de recogida

La entrevista tiene una duración aproximada de 90/120 minutos y se realizará preferentemente con el responsable técnico de cada proyecto en su centro de trabajo para facilitar la participación.

La entrevista sigue un guión semi-estructurado y para cada uno de los ítems se realizarán las aclaraciones necesarias tratando de homogeneizar las explicaciones introducidas para todos los proyectos que participen en la evaluación.

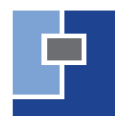

**PERSONAS SANAS,  
POBLACIONES SANAS**

## PROCEDIMIENTO

**Recogida de información a través del cuestionario de evaluación del impacto en los determinantes sociales de las desigualdades en salud.**

## 5. RESPONSABILIDADES Y SISTEMÁTICA OPERACIONAL

| Actividad                                                | Responsable                                                                                          | Despliegue                                                                                                                                                                                                                                                                                                                                                                                                                                                                                                                                                    |
|----------------------------------------------------------|------------------------------------------------------------------------------------------------------|---------------------------------------------------------------------------------------------------------------------------------------------------------------------------------------------------------------------------------------------------------------------------------------------------------------------------------------------------------------------------------------------------------------------------------------------------------------------------------------------------------------------------------------------------------------|
| Presentación del proyecto y solicitud de información     | Responsable técnico                                                                                  | El responsable técnico del proyecto se pondrá en contacto con los responsables de cada uno de los proyectos a evaluar con antelación suficiente y con el objeto de hacer una breve presentación de los objetivos del proceso de evaluación, así como de los aspectos metodológicos más relevantes.<br>Para profundizar en la información disponible de cada proyecto se solicitará en este momento la documentación más relevante del mismo que será la principal materia de estudio para la preparación del trabajo del equipo evaluador.                    |
| Análisis y documentación y reunión previa de preparación | Técnico del Servicio de Evaluación de la Salud, Calidad y Programas (DGSP)<br>Colaboradores externos | Una vez recibida la documentación el equipo de trabajo, que llevará a cabo la evaluación del proyecto, realizará una primera reunión con el objetivo de aclarar aquellas dudas que sean necesarias. En esta reunión participarán todos los miembros del equipo evaluador.                                                                                                                                                                                                                                                                                     |
| Entrevista y recogida de información                     |                                                                                                      | En esta fase se llevará a cabo la recogida de información con el responsable técnico de cada proyecto, introduciendo todas las aclaraciones que sean necesarias para cada uno de los diferentes ítems evaluados y tratando de que estas sean homogéneas para todos los proyectos evaluados.                                                                                                                                                                                                                                                                   |
| Puesta en común del equipo evaluador                     |                                                                                                      | En un plazo no superior a 15 días el equipo evaluador convocará una reunión con el objetivo de preparar el informe de evaluación de cada proyecto tratando de identificar fortalezas, posibles impactos negativos y áreas de mejora.                                                                                                                                                                                                                                                                                                                          |
| Solicitud de información anexa                           |                                                                                                      | En caso de que una vez realizada la puesta en común del equipo evaluador sea necesario solicitar información complementaria el equipo evaluador se pondrá en contacto con las personas entrevistadas con el objeto de recoger aquella información que sea necesaria.                                                                                                                                                                                                                                                                                          |
| Presentación del borrador de informe definitivo          |                                                                                                      | Una vez consensuado el borrador inicial del informe de evaluación se convocará una reunión a la que se invitará a participar a los responsables técnicos e institucionales del proyecto evaluado, así como a todo el equipo que ha participado en la evaluación y al Jefe del Servicio de Evaluación de la Salud y Programas. En esta reunión se presentarán los principales hallazgos de la evaluación, haciendo hincapié en las fortalezas, los posibles impactos negativos o aquellos que generen incertidumbres y las propuestas de mejora identificadas. |
| Elaboración y envío del Informe final                    |                                                                                                      | Una vez validado el informe éste se hará llegar vía correo electrónico a los responsables técnico e institucionales de los proyectos evaluados.                                                                                                                                                                                                                                                                                                                                                                                                               |
| Validación del informe                                   | Jefe del Servicio de Evaluación de la Salud y Programas                                              | La validación última del informe y como requisito previo para el posterior envío la llevará a cabo el Jefe del Servicio de Evaluación de la Salud y Programas                                                                                                                                                                                                                                                                                                                                                                                                 |

|                                                                                   |                                              |                                                                                                                                                                      |
|-----------------------------------------------------------------------------------|----------------------------------------------|----------------------------------------------------------------------------------------------------------------------------------------------------------------------|
|  | <b>PERSONAS SANAS,<br/>POBLACIONES SANAS</b> | <b>PROCEDIMIENTO</b><br><br>Recogida de información a través del cuestionario de evaluación del impacto en los determinantes sociales de las desigualdades en salud. |
|-----------------------------------------------------------------------------------|----------------------------------------------|----------------------------------------------------------------------------------------------------------------------------------------------------------------------|

6. ALGORITMO

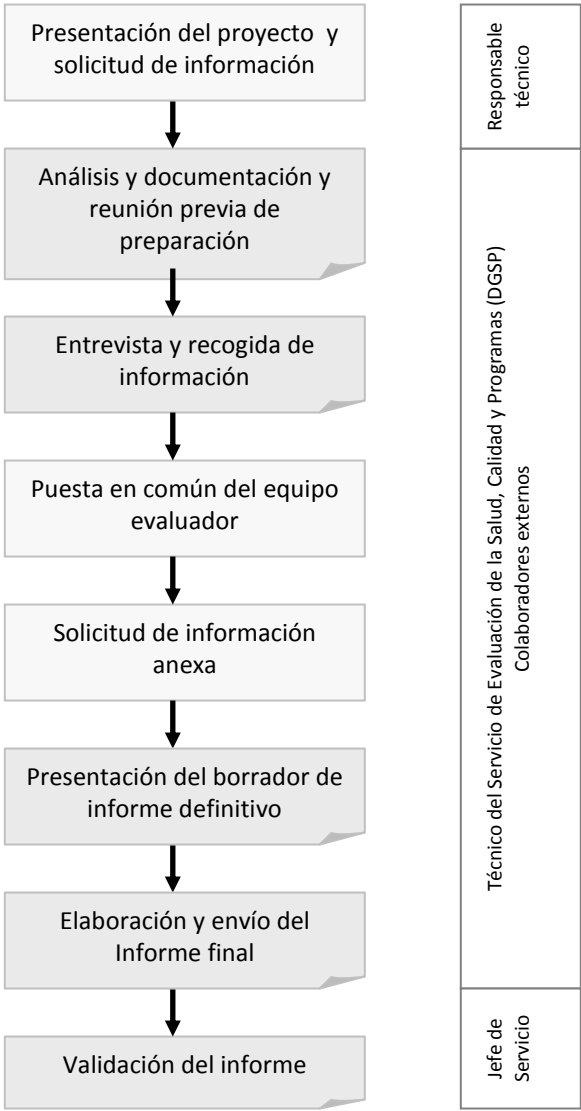

Supplement: mmc2 [file S0213911118300712:mmc2.pdf]
