# Supplementary material
Source: Elsevier journal article supplement (https://www.sciencedirect.com/science/article/pii/S0213911118300712)
Supplement: mmc1 [file S0213911118300712:mmc1.pdf]

# EVALUACIÓN DEL IMPACTO EN LOS DETERMINANTES SOCIALES DE LAS DESIGUALDADES EN SALUD

# 2017

El instrumento que se presenta a continuación es una herramienta adaptada del cuestionario de Cribado para la EIS de las Políticas públicas sectoriales elaborado por el Departamento de Salud del Gobierno Vasco. Es una herramienta de identificación de impactos en los Determinantes Sociales de las Desigualdades en Salud para su aplicación en la Evaluación de Impacto en Salud (EIS) y en otras actuaciones de ámbito autonómico, local y comunitario.

## Evaluación de Impacto en Salud (EIS)

**El documento original ha sido elaborado por:**

Aldasoro Elena, Bacigalupe Amaia, Calderón Carlos, Esnaola Santiago, Sanz Elvira  
*Herramienta de cribado para la Evaluación del Impacto en Salud de las políticas públicas sectoriales.* Vitoria-Gasteiz:  
Departamento de Salud del Gobierno Vasco, 2014.

Populazioaren osasuna  
**OSAGIN**  
Salud poblacional

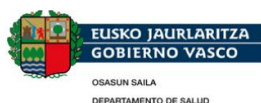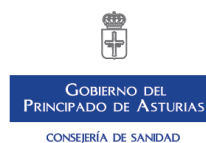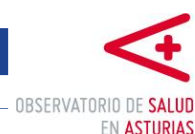

## INTRODUCCIÓN

La influencia de los determinantes sociales en la salud ha sido formulada ya a principios del siglo XX por diversos autores, pero no fue hasta los años ochenta, con la publicación de las primeras investigaciones en el Reino Unido, cuando comenzó a estudiarse de manera más exhaustiva y se planteó el concepto de desigualdades sociales en salud.

Actualmente muchos estudios corroboran que determinantes como la educación, la vivienda, el urbanismo, el medio ambiente, el transporte, el empleo, la protección social y las políticas fiscal son factores claves que afectan a la salud de la población. El estudio de estos determinantes sociales pretende describir su influencia en la aparición de determinadas enfermedades y explicar de qué modo dichos factores se traducen en problemas de salud.

Por otro lado, la Evaluación de Impacto en Salud (EIS) es una herramienta que tiene entre sus objetivos mejorar las decisiones en cuanto al efecto en que puede tener en la salud la puesta en marcha de diferentes políticas, tanto sanitarias como no sanitarias, y en cualquiera de las fases y niveles de formulación. La EIS se configura como un conjunto de procedimientos que permiten juzgar los efectos de una política, programa o proyecto en la salud de la población y la distribución de tales efectos en dicha población

Este cuestionario ha sido diseñado como un instrumento para el cribado de las políticas, planes, programas y proyectos de ámbito autonómico, con incorporación explícita del enfoque de equidad. Aunque en su origen fue diseñada para el cribado de propuestas, esta herramienta puede utilizarse para evaluar el posible impacto de programas de salud sobre estos determinantes sociales como una EIS rápida o de “despacho”.

El instrumento se estructura en tres secciones:

- **Sección 1:** tiene el doble objetivo de evaluar la importancia político-estratégica del programa para el gobierno autonómico y de identificar los grupos de población potencialmente afectado.
- **Sección 2:** destinada a valorar el posible impacto del programa sobre los determinantes sociales de la salud y las desigualdades en salud.
- **Sección 3:** Examina y sintetiza la información recogida en las secciones anteriores

## Fecha de realización de la EIS

**Título de la propuesta de trabajo** (políticas, normas, planes, programas, proyectos, etc.)

**Objetivos generales**

**Estado actual de desarrollo** (en fase de formulación, aprobación o ejecución)

**Persona responsable** (nombre, organización, puesto)

## SECCIÓN 1. CARACTERÍSTICAS CLAVE DE LA PROPUESTA POLÍTICA Y POBLACIÓN AFECTADA

### 1.1 Importancia de la propuesta política: coherencia con los compromisos estratégicos y en salud formulados por el gobierno autonómico

a) ¿La intervención se desarrolla de acuerdo con alguna de las siguientes **bases programáticas** acordadas por el Gobierno del Principado de Asturias?

|           | Bases programáticas                                                                                     | SI | NO | DUDOSO | JUSTIFICACIÓN |
|-----------|---------------------------------------------------------------------------------------------------------|----|----|--------|---------------|
| GENERALES | 1. Mejor <u>democracia</u> con más ciudadanía                                                           |    |    |        |               |
|           | 2. Una economía para el <u>empleo y bienestar social</u>                                                |    |    |        |               |
|           | 3. La <u>gestión inteligente</u> del territorio                                                         |    |    |        |               |
|           | 4. Los Servicios públicos de <u>bienestar</u> como núcleo del modelo social y base del modelo económico |    |    |        |               |
| SANIDAD   | 5. La gestión <u>eficiente</u> del nuevo Servicio de Salud                                              |    |    |        |               |
|           | 6. Mejorar la salud y eliminar <u>desigualdades</u> : fomentar confianza y construir ciudadanía sana    |    |    |        |               |
|           | 7. La mayor eficiencia en gestión y la mejor <u>calidad</u> del Sistema Sanitario                       |    |    |        |               |

b) ¿La intervención se desarrolla de acuerdo a alguna de las **áreas prioritarias** del **Plan de Salud** para Asturias?

| Áreas prioritarias                                                                                                                                                                                                                                                 | SI | NO | DUDOSO | JUSTIFICACIÓN |
|--------------------------------------------------------------------------------------------------------------------------------------------------------------------------------------------------------------------------------------------------------------------|----|----|--------|---------------|
| 1. <b>Avanzando en equidad</b> – Mejorar la salud de las personas más desfavorecidas disminuyendo las diferencias en salud.                                                                                                                                        |    |    |        |               |
| 2. <b>Sumando esfuerzos</b> – Reducir los riesgos para la salud procedentes del medioambiente físico y social a través de alianzas que generen un compromiso y una coordinación real y eficiente entre administraciones, asociaciones, profesionales y ciudadanos. |    |    |        |               |
| 3. <b>Ganando en salud</b> - Alcanzar una vida más larga y de mayor calidad.                                                                                                                                                                                       |    |    |        |               |
| 4. <b>Mejorando la calidad de la atención sanitaria</b> - Optimizar y hacer más eficaz, humano y sostenible el funcionamiento de los Servicios de Salud.                                                                                                           |    |    |        |               |

1.2 Población potencialmente afectada por la propuesta política

a) ¿A qué población o grupo social va dirigida la intervención? (población diana)

.....

.....

.....

b) Además de la población diana, puede haber otros grupos sociales que se ven afectados por la intervención de manera indirecta. Entre los grupos que se enumeran a continuación, ¿cuál/es de ellos pueden verse afectados directa o indirectamente?

|                                                                          |                                                                                 |
|--------------------------------------------------------------------------|---------------------------------------------------------------------------------|
| <input type="checkbox"/> Mujeres                                         | <input type="checkbox"/> Personas en función de su orientación sexual           |
| <input type="checkbox"/> Hombres                                         | <input type="checkbox"/> Población con diversidad funcional (física y/o mental) |
| <input type="checkbox"/> Población mayor de 65 años                      | <input type="checkbox"/> Población institucionalizada                           |
| <input type="checkbox"/> Población joven                                 | <input type="checkbox"/> Población con enfermedades crónicas                    |
| <input type="checkbox"/> Población infantil                              | <input type="checkbox"/> Población inmigrante de países empobrecidos            |
| <input type="checkbox"/> Población estudiante                            | <input type="checkbox"/> Población inmigrante de otros países                   |
| <input type="checkbox"/> Población trabajadora por cuenta propia o ajena | <input type="checkbox"/> Personas cuidadoras                                    |
| <input type="checkbox"/> Personas desempleadas                           | <input type="checkbox"/> Residentes en ámbito rural                             |
| <input type="checkbox"/> Población con posición socioeconómica alta      | <input type="checkbox"/> Residentes en ámbito urbano                            |
| <input type="checkbox"/> Población con posición socioeconómica media     | Otros (especificar): .....                                                      |
| <input type="checkbox"/> Población con posición socioeconómica baja      | .....                                                                           |
| <input type="checkbox"/> Personas “sin techo”                            |                                                                                 |

SECCIÓN 2. IMPACTO SOBRE LOS DETERMINANTES SOCIALES DE LA SALUD Y DE LAS DESIGUALDADES EN SALUD

| Tabla I. Determinantes transversales de las desigualdades sociales en salud |      |     |     |      |                 |                          |                  |
|-----------------------------------------------------------------------------|------|-----|-----|------|-----------------|--------------------------|------------------|
| Factores referidos a la estratificación social (desigualdades sociales)     |      |     |     |      | TIPO DE IMPACTO |                          |                  |
|                                                                             | (++) | (+) | (-) | (--) | D               | Justificación de impacto | Grupos afectados |
| Género                                                                      | ++   | +   | -   | --   |                 |                          |                  |
| Origen/etnia                                                                | ++   | +   | -   | --   |                 |                          |                  |
| Clase social (ocupación, nivel de estudios, renta)                          | ++   | +   | -   | --   |                 |                          |                  |
| Diversidad funcional                                                        | ++   | +   | -   | --   |                 |                          |                  |
| Edad                                                                        | ++   | +   | -   | --   |                 |                          |                  |
| Orientación sexual                                                          | ++   | +   | -   | --   |                 |                          |                  |
| Localización geográfica (urbano-rural, áreas degradadas, etc.)              | ++   | +   | -   | --   |                 |                          |                  |
| Ideología política                                                          | ++   | +   | -   | --   |                 |                          |                  |
| Creencias religiosas                                                        | ++   | +   | -   | --   |                 |                          |                  |
| Otros (especificar)                                                         | ++   | +   | -   | --   |                 |                          |                  |

| Tabla II. Determinantes intermedios de las desigualdades sociales en salud (I) |                 |     |     |      |   |                           |                  |
|--------------------------------------------------------------------------------|-----------------|-----|-----|------|---|---------------------------|------------------|
| Contexto socioeconómico y político                                             | TIPO DE IMPACTO |     |     |      |   |                           |                  |
|                                                                                | (++)            | (+) | (-) | (--) | D | Justificación del impacto | Grupos afectados |
| Capital social                                                                 | ++              | +   | -   | --   |   |                           |                  |
| Nivel educativo                                                                | ++              | +   | -   | --   |   |                           |                  |
| Desarrollo económico local                                                     | ++              | +   | -   | --   |   |                           |                  |
| Gobernanza / Buen gobierno                                                     | ++              | +   | -   | --   |   |                           |                  |
| Empleo y condiciones de trabajo                                                | ++              | +   | -   | --   |   |                           |                  |
| Condiciones de la vivienda                                                     | ++              | +   | -   | --   |   |                           |                  |
| <b>Medio ambiente</b>                                                          |                 |     |     |      |   |                           |                  |
| Calidad del agua, aire y suelo                                                 | ++              | +   | -   | --   |   |                           |                  |
| Ruidos, contaminación acústica                                                 | ++              | +   | -   | --   |   |                           |                  |
| Gestión de residuos                                                            | ++              | +   | -   | --   |   |                           |                  |
| Disponibilidad de espacios públicos adecuados para las relaciones sociales     | ++              | +   | -   | --   |   |                           |                  |
| Densidad del tráfico                                                           | ++              | +   | -   | --   |   |                           |                  |
| Otros (especificar)                                                            | ++              | +   | -   | --   |   |                           |                  |

| Tabla II. Determinantes intermedios de las desigualdades sociales en salud (II) |      |     |     |      |   |                           |
|---------------------------------------------------------------------------------|------|-----|-----|------|---|---------------------------|
| Calidad del sistema sanitario                                                   |      |     |     |      |   | TIPO DE IMPACTO           |
|                                                                                 | (++) | (+) | (-) | (--) | D | Justificación del impacto |
| Calidad técnica                                                                 |      |     |     |      |   |                           |
| Continuidad de cuidados, accesibilidad, seguridad                               |      |     |     |      |   |                           |
| Accesibilidad a servicios básicos                                               |      |     |     |      |   |                           |
| Calidad percibida (satisfacción de los usuarios/as)                             |      |     |     |      |   |                           |
| Factores individuales: conductas y variables psicosociales                      |      |     |     |      |   | TIPO DE IMPACTO           |
|                                                                                 | (++) | (+) | (-) | (--) | D | Justificación del impacto |
| Estrés psicosocial (inseguridad laboral, discriminación)                        | ++   | +   | -   | --   |   |                           |
| Autoestima individual y colectiva (renombre o prestigio del barrio y/o ciudad)  | ++   | +   | -   | --   |   |                           |
| Autonomía o autorresponsabilidad y empoderamiento del individuo                 | ++   | +   | -   | --   |   |                           |
| Actividad física                                                                | ++   | +   | -   | --   |   |                           |
| Alimentación saludable                                                          | ++   | +   | -   | --   |   |                           |
| Consumo de tabaco                                                               | ++   | +   | -   | --   |   |                           |
| Consumo excesivo de alcohol                                                     | ++   | +   | -   | --   |   |                           |
| Consumo de sustancias ilegales                                                  | ++   | +   | -   | --   |   |                           |
| Prácticas de sexo seguro                                                        | ++   | +   | -   | --   |   |                           |
| Actividades lúdicas o de ocio que fomenten la relación interpersonal            | ++   | +   | -   | --   |   |                           |
| Otros (especificar)                                                             | ++   | +   | -   | --   |   |                           |



SECCIÓN 3. RESUMEN DE LOS IMPACTOS Y PROPUESTA DE RECOMENDACIONES PRELIMINARES

Recapitulación de lo hallado

Una vez cumplimentada la tabla con la identificación de los impactos (positivos y negativos) en los DSS y en los grupos sociales se procederá, de manera sintetizada, a describir las implicaciones más relevantes para la salud de la propuesta de trabajo a estudio.

En esta fase se debe centrar la atención en los impactos identificados tanto en los DSS como en los grupos sociales y además, en la existencia de incertidumbre sobre el efecto en la salud o en algún grupo de población que requiera un estudio de mayor profundidad.

A modo de resumen se pueden clasificar los hallazgos en los siguientes apartados

|                                                                                                                                  |
|----------------------------------------------------------------------------------------------------------------------------------|
| Coherencia con las líneas estratégicas de la Organización (mirar cuestión 1.1 de sección I)a                                     |
|                                                                                                                                  |
| ¿Se prevé que genere desigualdades o aumente las ya existentes? (mirar cuestión 1.2 de sección I y última columna de sección II) |
|                                                                                                                                  |
| Incertidumbre en relación a algún grupo social (mirar cuestión 1.2 de sección I y última columna de sección II)                  |
|                                                                                                                                  |
| Impactos negativos, inciertos o difusos identificados (mirar sección II)                                                         |
|                                                                                                                                  |
| Áreas de mejora identificadas                                                                                                    |
|                                                                                                                                  |
| Barreras y elementos facilitadores identificados para la puesta en marcha de las acciones de mejora                              |
|                                                                                                                                  |
